# Supplementary material for: The quiet crossing of ocean tipping points
Source: PubMed Central journal article supplement (PMC7936299; doi:10.1073/pnas.2008478118), 2021-02-22
Supplement: pnas.2008478118.sapp.pdf [file pnas.2008478118.sapp.pdf]

## SI Appendix. Supporting Information.

**Table S1.** Candidates for high-probability high-impact tipping points and tipping elements.

| <b>Area/tipping element</b>                                                     | <b>Driver</b>                                | <b>Physical-biogeochemical variables affected</b>                                                                              | <b>Hazards concerning:</b>                                                                                                     | <b>References and examples</b> |
|---------------------------------------------------------------------------------|----------------------------------------------|--------------------------------------------------------------------------------------------------------------------------------|--------------------------------------------------------------------------------------------------------------------------------|--------------------------------|
| Coastal acidification                                                           | $C_{\text{anthro}}$ , $V_{\text{ocean}}$     | DIC, pH, $\Omega_{\text{calcite}}$ , $\Omega_{\text{aragonite}}$                                                               | Coastal ecosystem functioning, key species, marine living resources                                                            | (1, 2)                         |
| Coastal deoxygenation                                                           | $\Delta T$ , $V_{\text{ocean}}$              | $O_2$                                                                                                                          | Coastal ecosystem functioning, key species, marine living resources, further eutrophication, harmful algae blooms              | (3, 4)                         |
| Open ocean deoxygenation                                                        | $\Delta T$ , $V_{\text{ocean}}$              | $O_2$                                                                                                                          | Marine living resources                                                                                                        | (5-7)                          |
| Arctic sea ice reduction                                                        | $\Delta T$ , $V_{\text{ocean}}$              | Light availability, biological primary production, T                                                                           | Shift in ecosystem intensification away from coast, warming, invasive species, species loss, marine living resources           | (8, 9)                         |
| Marine permafrost thaw                                                          | $\Delta T$ , $V_{\text{ocean}}$              | DIC, pH, $\Omega_{\text{calcite}}$ , $\Omega_{\text{aragonite}}$                                                               | CH <sub>4</sub> outgassing, increase in ocean dissolved carbon, less ocean CO <sub>2</sub> uptake, atmospheric CO <sub>2</sub> | (10)                           |
| Polar acidification                                                             | $C_{\text{anthro}}$                          | DIC, pH, $\Omega_{\text{calcite}}$ , $\Omega_{\text{aragonite}}$                                                               | Ecosystem functioning, key species, marine living resources                                                                    | (11, 12)                       |
| Warm water coral reef degradation                                               | $\Delta T$ , $C_{\text{anthro}}$             | pH, T                                                                                                                          | Coral bleaching, ecosystem functioning, species loss, coastal erosion, key species, marine living resources                    | (13, 14)                       |
| Large-scale ocean circulation changes (deep convection, upwelling, overturning) | $\Delta T$ , $\Delta S$                      | DIC, Alk, pH, $\Omega_{\text{calcite}}$ , $\Omega_{\text{aragonite}}$ , $O_2$ , T, S, nutrients, biological primary production | Ecosystem functioning, ocean CO <sub>2</sub> uptake, heat accumulation, pH change accumulation                                 | (15-17)                        |
| El Niño and Monsoon alterations                                                 | $\Delta T$ , $\Delta S$ , $V_{\text{ocean}}$ | DIC, Alk, pH, $\Omega_{\text{calcite}}$ , $\Omega_{\text{aragonite}}$ , $O_2$ , T, S, nutrients, biological primary production | Ecosystem functioning, marine living resources, ocean CO <sub>2</sub> uptake, heat accumulation, accumulation of pH changes    | (18-20)                        |
| Open ocean warming and marine heat waves                                        | $\Delta T$                                   | T, biological primary production                                                                                               | Ecosystem functioning, marine living resources, ocean CO <sub>2</sub> uptake, heat accumulation                                | (21-23)                        |
| Open Ocean acidification                                                        | $C_{\text{anthro}}$ , $V_{\text{ocean}}$     | DIC, pH, $\Omega_{\text{calcite}}$ , $\Omega_{\text{aragonite}}$                                                               | Ecosystem functioning, key species, marine living resources, deep-sea ecosystems                                               | (24-26)                        |

See following pages for explanation of symbols and references.

**Explanation of symbols:**

$V_{\text{ocean}}$ : ocean velocity field

$C_{\text{anthro}}$ : additional ocean carbon from uptake of atmospheric excess  $\text{CO}_2$

T: seawater temperature

$\Delta T$ : temperature change

S: salinity

$\Delta S$ : salinity change due to change in fresh water fluxes including ice melt

DIC: total dissolved inorganic carbon

Alk: alkalinity (ability of sea water to dissociate  $\text{CO}_2$ )

pH: ph-value,  $\text{pH} = -\log_{10}([\text{H}^+])$ .

$\Omega_{\text{calcite}}$ : saturation state for calcite ( $\text{CaCO}_3$ ), the boundary between over- and undersaturation is at  $\Omega_{\text{calcite}}=1$

$\Omega_{\text{aragonite}}$ : saturation state for aragonite ( $\text{CaCO}_3$ ), the boundary between over- and undersaturation is at  $\Omega_{\text{aragonite}}=1$

$\text{O}_2$ : dissolved oxygen

**SI references list:**

1. R. A. Feely, C. L. Sabine, J. M. Hernandez-Ayon, D. Ianson, B. Hales, Evidence for upwelling of corrosive "acidified" water onto the continental shelf. *Science* **320**, 1490-1492 (2008).
2. A. C. Franco, N. Gruber, T. L. Frölicher, L. K. Artman, Contrasting Impact of Future  $\text{CO}_2$  Emission Scenarios on the Extent of  $\text{CaCO}_3$  Mineral Undersaturation in the Humboldt Current System. *J Geophys Res-Oceans* **123**, 2018-2036 (2018).
3. F. Chan *et al.*, Emergence of anoxia in the California current large marine ecosystem. *Science* **319**, 920-920 (2008).
4. R. J. Diaz, R. Rosenberg, Spreading dead zones and consequences for marine ecosystems. *Science* **321**, 926-929 (2008).
5. R. F. Keeling, A. Körtzinger, N. Gruber, Ocean Deoxygenation in a Warming World. *Annual Review of Marine Science* **2**, 199-229 (2010).
6. K. E. Limburg, D. Breitburg, D.P. Swaney, G. Jacinto, Ocean Deoxygenation: A Primer. *One Earth*, **2**, 25-29 (2020).
7. L. Bopp *et al.*, Multiple stressors of ocean ecosystems in the 21st century: projections with CMIP5 models. *Biogeosciences* **10**, 6225-6245 (2013).
8. ACIA, *Impacts of a Warming Arctic: Arctic Climate Impact Assessment. ACIA Overview report.* (2004), pp. 140.
9. T. M. Lenton, Arctic Climate Tipping Points. *Ambio* **41**, 10-22 (2012).
10. N. Shakhova *et al.*, Current rates and mechanisms of subsea permafrost degradation in the East Siberian Arctic Shelf. *Nat Commun* **8** (2017).
11. N. R. Bates, J. T. Mathis, The Arctic Ocean marine carbon cycle: evaluation of air-sea  $\text{CO}_2$  exchanges, ocean acidification impacts and potential feedbacks. *Biogeosciences* **6**, 2433-2459 (2009).
12. M. Steinacher, F. Joos, T. L. Frölicher, G. K. Plattner, S. C. Doney, Imminent ocean acidification in the Arctic projected with the NCAR global coupled carbon cycle-climate model. *Biogeosciences* **6**, 515-533 (2009).
13. O. Hoegh-Guldberg *et al.*, Coral reefs under rapid climate change and ocean acidification. *Science* **318**, 1737-1742 (2007).
14. T. P. Hughes *et al.*, Global warming and recurrent mass bleaching of corals. *Nature* **543**, 373-+ (2017).
15. H. L. Bryden, H. R. Longworth, S. A. Cunningham, Slowing of the Atlantic meridional overturning circulation at 25 degrees N. *Nature* **438**, 655-657 (2005).
16. G. A. Meehl *et al.*, "Global Climate Projections" in Climate Change 2007: The Physical Science Basis. Contribution of Working Group I to the Fourth Assessment Report of the Intergovernmental Panel on Climate Change, S. Solomon, D. Qin, M. Manning, Z. Chen, M. Marquis, K.B. Averyt, M. Tignor and H.L. Miller, Ed.

- (Cambridge University Press, Cambridge, United Kingdom and New York, NY, USA, 2007), pp. 747-845.
17. W. Weijer *et al.*, Stability of the Atlantic Meridional Overturning Circulation: A Review and Synthesis. *J Geophys Res-Oceans* **124**, 5336-5375 (2019).
  18. K. M. Brander, Global fish production and climate change. *P Natl Acad Sci USA* **104**, 19709-19714 (2007).
  19. W. J. Cai *et al.*, Increasing frequency of extreme El Nino events due to greenhouse warming. *Nat Clim Change* **4**, 111-116 (2014).
  20. Z. Lachkar, M. Levy, S. Smith, Intensification and deepening of the Arabian Sea oxygen minimum zone in response to increase in Indian monsoon wind intensity. *Biogeosciences* **15**, 159-186 (2018).
  21. N. A. Bond, M. F. Cronin, H. Freeland, N. Mantua, Causes and impacts of the 2014 warm anomaly in the NE Pacific. *Geophys Res Lett* **42**, 3414-3420 (2015).
  22. T. L. Frolicher, E. M. Fischer, N. Gruber, Marine heatwaves under global warming. *Nature* **560**, 360-+ (2018).
  23. J. F. Piatt *et al.*, Extreme mortality and reproductive failure of common murrelets resulting from the northeast Pacific marine heatwave of 2014-2016. *Plos One* **15** (2020).
  24. M. Gehlen *et al.*, Projected pH reductions by 2100 might put deep North Atlantic biodiversity at risk. *Biogeosciences* **11**, 6955-6967 (2014).
  25. L. Kwiatkowski *et al.*, Twenty-first century ocean warming, acidification, deoxygenation, and upper-ocean nutrient and primary production decline from CMIP6 model projections. *Biogeosciences* **17**, 3439-3470 (2020).
  26. J. C. Orr *et al.*, Anthropogenic ocean acidification over the twenty-first century and its impact on calcifying organisms. *Nature* **437**, 681-686 (2005).
